# Supplementary material
Source: publisher figshare collection journal article supplement (https://rs.figshare.com/ndownloader/files/13764023)
Supplement: Supplementary file 1 [file 13764023]

## Sheet: Sheet 1
id	index	ratio	exp
1	0.733333	0.25	number
2	1	0.25	number
3	0.666667	0.25	number
4	0.8	0.25	number			Journal	Biology Letters
5	0.733333	0.25	number			Title	Continuous and discrete quantity discrimination in tortoises
8	0.666667	0.25	number			Authors	Andrea Gazzola, Giorgio Vallortigara, Daniele Pellitteri-Rosa
10	0.8	0.25	number
11	0.6	0.25	number
13	0.8	0.25	number
15	0.533333	0.25	number
17	0.533333	0.25	number
18	0.8	0.25	number
19	0.666667	0.25	number
20	0.666667	0.25	number
21	0.6	0.25	number
23	0.466667	0.25	number
1	0.466667	0.5	number
2	0.6	0.5	number
3	0.733333	0.5	number
4	0.466667	0.5	number
5	0.466667	0.5	number
8	0.4	0.5	number
10	0.8	0.5	number
11	0.733333	0.5	number
13	0.666667	0.5	number
15	0.466667	0.5	number
17	0.733333	0.5	number
18	0.666667	0.5	number
19	0.666667	0.5	number
20	0.266667	0.5	number
21	0.6	0.5	number
23	0.733333	0.5	number
1	0.666667	0.67	number
2	0.733333	0.67	number
3	0.533333	0.67	number
4	0.6	0.67	number
5	0.6	0.67	number
8	0.533333	0.67	number
10	0.8	0.67	number
11	0.6	0.67	number
13	0.4	0.67	number
15	0.466667	0.67	number
17	0.4	0.67	number
18	0.666667	0.67	number
19	0.533333	0.67	number
20	0.6	0.67	number
21	0.6	0.67	number
23	0.466667	0.67	number
1	0.533333	0.75	number
2	0.6	0.75	number
3	0.533333	0.75	number
4	0.466667	0.75	number
5	0.533333	0.75	number
8	0.466667	0.75	number
10	0.4	0.75	number
11	0.733333	0.75	number
13	0.533333	0.75	number
15	0.6	0.75	number
17	0.866667	0.75	number
18	0.666667	0.75	number
19	0.6	0.75	number
20	0.466667	0.75	number
21	0.6	0.75	number
23	0.8	0.75	number
1	0.733333	0.25	size
2	1	0.25	size
4	0.866667	0.25	size
8	0.6	0.25	size
10	0.818182	0.25	size
13	0.6	0.25	size
17	0.8	0.25	size
18	0.933333	0.25	size
19	1	0.25	size
20	0.8	0.25	size
21	0.666667	0.25	size
22	0.8	0.25	size
23	0.666667	0.25	size
24	0.733333	0.25	size
25	0.866667	0.25	size
1	0.6	0.5	size
2	0.733333	0.5	size
4	0.8	0.5	size
8	0.533333	0.5	size
10	0.5	0.5	size
13	0.533333	0.5	size
17	0.533333	0.5	size
18	0.866667	0.5	size
19	0.5625	0.5	size
20	0.666667	0.5	size
21	0.6	0.5	size
22	0.733333	0.5	size
23	0.866667	0.5	size
24	0.733333	0.5	size
25	0.6	0.5	size
1	0.733333	0.67	size
2	0.8	0.67	size
4	0.6	0.67	size
8	0.4	0.67	size
10	0.375	0.67	size
13	0.333333	0.67	size
17	0.466667	0.67	size
18	0.533333	0.67	size
19	0.857143	0.67	size
20	0.666667	0.67	size
21	0.533333	0.67	size
22	0.666667	0.67	size
23	0.6	0.67	size
24	0.666667	0.67	size
25	0.6	0.67	size
1	0.533333	0.75	size
2	0.733333	0.75	size
4	0.533333	0.75	size
8	0.6	0.75	size
10	0.75	0.75	size
13	0.4	0.75	size
17	0.533333	0.75	size
18	0.666667	0.75	size
19	0.866667	0.75	size
20	0.733333	0.75	size
21	0.733333	0.75	size
22	0.533333	0.75	size
23	0.666667	0.75	size
24	0.733333	0.75	size
25	0.733333	0.75	size
